# Supplementary material for: Developing A Prioritisation Framework for Patients in Need of Coronary Artery Angiography
Source: Research Square preprint supplement (doi:10.21203/rs.3.rs-107869/v1), 2020-11-30
Supplement: Supplementary file 1 [file 049e2c53c1b5bc64942aa01a.docx]

Additional file 2: Value of factors in first round of Delphi

| **Score of**  **Measurable** | **Score of**  **Importance** | **Factors** | **No** |
| --- | --- | --- | --- |
| 8 | 9 | Severe pain and symptoms | 1 |
| 3 | 7 | Severity of disease | 2 |
| 7 | 5 | Age | 3 |
| 8 | 7.5 | Positive exercise test | 4 |
| 9 | 2 | Marital status | 5 |
| 8 | 7 | Number of myocardial infarctions | 6 |
| 7 | 5 | Intensity of stress while waiting | 7 |
| 7 | 6 | Family history | 8 |
| 8.5 | 2 | Sex | 9 |
| 7 | 3 | The importance of the vessel requires intervention | 10 |
| 7 | 6.5 | Complications of staying on the waiting list | 11 |
| 6.5 | 7 | Probably risk | 12 |
| 7 | 3 | Number of blocked vessels | 13 |
| 7 | 6 | Percentage of clogged arteries | 14 |
| 6 | 5 | The probability of successful action after angiography | 15 |
| 8 | 8 | Accompanying diseases such as diabetes and ... | 16 |
| 8 | 3.5 | Smoking | 17 |
| 6.5 | 5.5 | Allow other surgery | 18 |
| 8 | 8 | ECG changes | 19 |
| 7.5 | 3 | PTCA history | 20 |
| 7 | 3 | CABG history | 21 |
| 7.5 | 6 | History of valve surgery | 22 |
| 6 | 6.5 | Severe disease progression | 23 |
| 6 | 8 | Risk of death | 24 |
| 5 | 3 | Decreased individual ability | 25 |
| 8 | 7 | Waiting time | 26 |
| 5.5 | 3 | Number of dependents | 27 |
| 6 | 6 | Expected profit | 28 |
| 5 | 1 | Social value | 29 |
| 7 | 2 | The priority is to be a partner | 30 |
| 7 | 2.5 | Quality of life | 31 |
| 5.5 | 2.5 | Custom patient | 32 |
| 7 | 8 | Decreased socio-economic performance | 33 |
| 3 | 4 | Social threat | 34 |
| 3.5 | 3 | Drugs and alcohol | 35 |
| 6.5 | 6 | The importance of the individual to society | 36 |
| 8 | 7 | Special condition | 37 |
