# Supplementary material for: Developing A Prioritisation Framework for Patients in Need of Coronary Artery Angiography
Source: Research Square preprint supplement (doi:10.21203/rs.3.rs-107869/v1), 2020-11-30
Supplement: Supplementary file 2 [file 08782c631b8ed808fd9304b4.docx]

Additional file 3: Agreement rate between the factors entered to the second round of Delphi

| **Agreement rate** | **Factors** | **No** |
| --- | --- | --- |
| Lower than 80% | Age | 1 |
| Lower than 80% | Intensity of stress while waiting | 2 |
| Higher than 80 % | Family history | 3 |
| Higher than 80 % | Complications of staying on the waiting list | 4 |
| Higher than 80 % | Probably risk | 5 |
| Higher than 80 % | Probability of successful operation after angiography | 6 |
| Higher than 80 % | Allow other surgery | 7 |
| Higher than 80 % | Valve operation history | 8 |
| Higher than 80 % | Risk of death | 9 |
| Higher than 80 % | Expected profit | 10 |
| Higher than 80 % | The priority is to be a partner | 11 |
| Higher than 80 % | Percentage of clogged arteries | 12 |
| Higher than 80 % | The importance of the individual to society | 13 |
