# Supplementary material for: Developing A Prioritisation Framework for Patients in Need of Coronary Artery Angiography
Source: Research Square preprint supplement (doi:10.21203/rs.3.rs-107869/v1), 2020-11-30
Supplement: Supplementary file 3 [file 62e4a927b3a61e305c531c44.docx]

Additional file 4: Rating method to weighting factors

| **Preferential value** | **Compare factor i with j** | **Description** |
| --- | --- | --- |
| **1** | equal importance | factor i is equally important to j or does not take precedence over each other |
| **3** | relatively more important | factor i is slightly more important than j |
| **5** | more importantly | factor i is more important than j |
| **7** | much more important | factor i has a much higher preference than j |
| **9** | quite important | factor i is absolutely more important than j and it is not comparable to j |
| Other values (2,4,6,8) | -- | intermediate values between preferential values. For example, 8 indicates a value greater than 7 but lower than 9. |
